# Supplementary material for: Prospective Cohort Study of Childhood-Onset Stargardt Disease: Fundus Autofluorescence Imaging, Progression, Comparison with Adult-Onset Disease, and Disease Symmetry
Source: PubMed Central journal article supplement (PMC7082771; doi:10.1016/j.ajo.2019.11.008), 2020-03
Supplement: mmc1.pdf [file mmc1.pdf]

Supplementary Table 1

## Children at Baseline with Childhood-onset Disease

| Patient ID | Sex      | Pedigree | Age of Disease Onset | ERG Group | Genotype Classification | cDNA-Change | Variants                                                       | Protein Effect                                                          |
|------------|----------|----------|----------------------|-----------|-------------------------|-------------|----------------------------------------------------------------|-------------------------------------------------------------------------|
| 1          | MM_0020* | F        | 20660                | 7         | 3                       | B           | c.4918C>T;c.4222T>C<br>c.247_248insCAAA                        | p.Arg1640Trp;p.Trp1408Arg<br>p.Gln83ProfsTer17                          |
| 2          | MM_0021* | M        | 31700                | 14        | 1                       | C           | c.5882G>A<br>c.4793C>A                                         | p.Gly1961Glu<br>p.Ala1598Asp                                            |
| 3          | MM_0026* | F        | 20553                | 9         | 3                       | C           | c.5549T>C<br>c.4469G>A                                         | p.Leu1850Pro<br>p.Cys1490Tyr                                            |
| 4          | MM_0034  | F        | 20096                | 14        | 1                       | C           | c.5882G>A<br>c.1531C>T<br>c.872C>T                             | p.Gly1961Glu<br>p.Arg511Cys<br>p.Pro291Leu                              |
| 5          | MM_0035  | F        | 20096                | 14        | 1                       | C           | <b>c.5218_5219insCTG</b><br>c.5882G>A<br>c.1531C>T<br>c.872C>T | <b>In-frame insertion</b><br>p.Gly1961Glu<br>p.Arg511Cys<br>p.Pro291Leu |
| 6          | MM_0058* | M        | 20002                | 14        | 1                       | B           | <b>c.5218_5219insCTG</b><br>c.5882G>A<br>c.454C>T              | <b>In-frame insertion</b><br>p.Gly1961Glu<br>p.Arg152Ter                |
| 7          | MM_0070* | F        | 20892                | 11        | 1                       | C           | c.5882G>A;c.3758C>T<br>c.3364G>A                               | p.Gly1961Glu;p.Thr1253Met<br>p.Glu1122Lys                               |
| 8          | MM_0090* | F        | 20935                | 13        | 1                       | B           | c.3322C>T                                                      | p.Arg1108Cys                                                            |
| 9          | MM_0107* | F        | 19545                | 9         | 1                       | B           | c.3210_3211insGT<br>c.5161_5162delAC                           | p.Ser1071CysfsTer14<br>p.Thr1721TfsTer65                                |
| 10         | MM_0108* | F        | 19545                | 8         | 1                       | B           | c.2588G>C<br>c.5161_5162delAC                                  | p.Gly863Ala<br>p.Thr1721TfsTer65                                        |
| 11         | MM_0113* | F        | 19820                | 11        | 1                       | A           | c.2588G>C<br>c.6817-2A>C                                       | p.Gly863Ala<br>Splice site alteration                                   |
| 12         | MM_0128  | M        | NA                   | 7         | 1                       | B           | c.1906C>T<br>c.2521C>T                                         | p.Gln636Ter<br>p.Gln841Ter                                              |
| 13         | MM_0129  | F        | NA                   | 12        | NA                      | B           | c.6079C>T<br>c.2521C>T<br>c.6079C>T                            | p.Leu2027Phe<br>p.Gln841Ter<br>p.Leu2027Phe                             |
| 14         | MM_0130* | M        | 2186                 | 8         | 1                       | B           | c.768G>T<br>c.634C>T                                           | p.Val256Val,Splice site alteration<br>p.Arg212Cys                       |
| 15         | MM_0131* | F        | 2186                 | 7         | 1                       | B           | c.768G>T<br>c.634C>T                                           | p.Val256Val,Splice site alteration<br>p.Arg212Cys                       |
| 16         | MM_0138* | M        | 21220                | 7         | 3                       | B           | c.5898+2T>C<br>c.286A>T                                        | Splice site alteration<br>p.Asn96Tyr                                    |
| 17         | MM_0146* | F        | 20522                | 14        | 1                       | B           | c.5196+1137G>A<br>c.3364G>A                                    | Deep intronic change<br>p.Glu1122Lys                                    |
| 18         | MM_0148* | F        | 20026                | 8         | 3                       | B           | c.5461-10T>C<br>c.3259G>A                                      | Splice site alteration<br>p.Glu1087Lys                                  |
| 19         | MM_0185* | F        | 20660                | 5         | NA                      | B           | c.4918C>T;c.4222T>C<br>c.247_248insCAAA                        | p.Arg1640Trp;p.Trp1408Arg<br>p.Gln83ProfsTer17                          |
| 20         | MM_0225* | M        | 22229                | 4         | 2                       | C           | c.4469G>A<br>c.6449G>A                                         | p.Cys1490Tyr<br>p.Cys2150Tyr                                            |
| 21         | MM_0227* | F        | 32058                | 12        | 1                       | C           | c.6391G>A<br>c.1957C>T<br>c.1411G>A                            | p.Glu2131Lys<br>p.Arg653Cys<br>p.Glu471Lys                              |
| 22         | MM_0228* | F        | 32453                | 9         | 2                       | D           | c.3113C>T;c.1622T>C                                            | p.Ala1038Val;p.Leu541Pro                                                |
| 23         | MM_0230* | F        | 21352                | 7         | 1                       | C           | c.4139C>T<br>c.2588G>C                                         | p.Pro1380Leu<br>p.Gly863Ala                                             |
| 24         | MM_0240* | M        | 21562                | 5         | 1                       | D           | c.29_30insT                                                    | p.Leu10PhefsTer44                                                       |
| 25         | MM_0241* | F        | 30455                | 6         | 3                       | C           | c.3064G>A<br>c.3064G>A                                         | p.Glu1022Lys<br>p.Glu1022Lys                                            |
| 26         | MM_0246* | M        | 21513                | 7         | 3                       | C           | c.5461-10T>C<br>c.4326C>A                                      | Splice site alteration<br>p.Asn1442Lys                                  |

Supplementary Table 1- Continue

## Children at Baseline with Childhood-onset Disease

| Patient ID | Sex      | Pedigree | Age of Disease Onset | ERG Group | Genotype Classification | cDNA-Change | Variants                                                       | Protein Effect                                                   |
|------------|----------|----------|----------------------|-----------|-------------------------|-------------|----------------------------------------------------------------|------------------------------------------------------------------|
| 27         | MM_0258* | F        | 31588                | 10        | 1                       | C           | c.4793C>A<br>c.2300T>A                                         | p.Ala1598Asp<br>p.Val767Asp                                      |
| 28         | MM_0260* | F        | 20825                | 6         | 1                       | B           | <b><u>c.4539+2065C&gt;G</u></b><br><b><u>c.6118C&gt;T</u></b>  | <b><u>Deep intronic change</u></b><br><b><u>p.Arg2040Ter</u></b> |
| 29         | MM_0267* | M        | 19363                | 7         | 1                       | C           | c.4469G>A<br>c.5318C>A                                         | p.Cys1490Tyr<br>p.Ala1973Glu                                     |
| 30         | MM_0281* | F        | 21433                | 4         | 3                       | B           | c.4469G>A<br>c.3191-1G>T                                       | p.Cys1490Tyr<br>Splice site alteration                           |
| 31         | MM_0282* | F        | 22725                | 6         | 3                       | B           | c.5461-10T>C<br>c.4363T>C                                      | Splice site alteration<br>p.Cys1455Arg                           |
| 32         | MM_0284* | M        | 21244                | 7         | NA                      | C           | c.1253T>C<br>c.1253T>C                                         | p.Phe418Ser<br>p.Phe418Ser                                       |
| 33         | MM_0286* | M        | 18989                | 9         | 2                       | C           | c.4685T>C<br>c.4469G>A<br>c.2588G>C                            | p.Ile1562Thr<br>p.Cys1490Tyr<br>p.Gly863Ala                      |
| 34         | MM_0291* | M        | 22635                | 10        | 1                       | C           | c.1648G>A<br>c.4918C>T                                         | p.Gly550Arg<br>p.Arg1640Trp                                      |
| 35         | MM_0310* | M        | 22586                | 7         | 1                       | B           | c.885delC<br>c.1804C>T                                         | p.Asp295AspfsTer5<br>p.Arg602Trp                                 |
| 36         | MM_0312* | F        | 22835                | 6         | 2                       | B           | c.3322C>T<br>c.454C>T                                          | p.Arg1108Cys<br>p.Arg152Ter                                      |
| 37         | MM_0314* | F        | 20680                | 7         | 1                       | B           | c.5461-10T>C<br>c.4139C>T                                      | Splice site alteration<br>p.Pro1380Leu                           |
| 38         | MM_0324  | F        | 21659                | 10        | 1                       | D           | c.4774-27T>C<br>c.5196+1137G>A                                 | Deep intronic change<br>Deep intronic change                     |
| 39         | MM_0325* | F        | 21396                | 7         | 3                       | C           | c.214G>A<br>c.214G>A                                           | p.Gly72Arg<br>p.Gly72Arg                                         |
| 40         | MM_0326* | M        | 21396                | 7         | 3                       | C           | c.214G>A<br>c.214G>A                                           | p.Gly72Arg<br>p.Gly72Arg                                         |
| 41         | MM_0335* | F        | 21479                | 12        | 1                       | B           | c.6319C>T<br>c.5461-10T>C                                      | p.Arg2107Cys<br>Splice site alteration                           |
| 42         | MM_0351* | M        | 23342                | 8         | 1                       | B           | c.1253T>C<br>c.4773+1G>T                                       | p.Phe418Ser<br>Splice site alteration                            |
| 43         | MM_0356* | M        | 22496                | 7         | 1                       | C           | c.1253T>C<br>c.3322C>T                                         | p.Phe418Ser<br>p.Arg1108Cys                                      |
| 44         | MM_0360* | F        | 21396                | 5         | 3                       | C           | c.214G>A<br>c.214G>A                                           | p.Gly72Arg<br>p.Gly72Arg                                         |
| 45         | MM_0382* | F        | 22706                | 14        | 2                       | A           | c.6445C>T<br>c.5018+5G>A                                       | p.Arg2149Ter<br>Splice site alteration                           |
| 46         | MM_0399* | F        | 20236                | 11        | 1                       | B           | c.1622T>C; c.3113C>T<br>c.5714+5G>A                            | p.Leu541Pro;p.Ala1038Val<br>Splice site alteration               |
| 47         | MM_0421* | F        | 22362                | 11        | 3                       | C           | c.4571A>G<br>c.4571A>G                                         | p.Asp1524Gly<br>p.Asp1524Gly                                     |
| 48         | MM_0426* | M        | 21140                | 6         | 1                       | A           | c.6729+5_19delGTTGGCCCTGGGGCA<br>c.6729+5_19delGTTGGCCCTGGGGCA | Splice site alteration<br>Splice site alteration                 |
| 49         | MM_0431* | M        | 23221                | 13        | 2                       | C           | c.6320G>A<br>c.2385C>G                                         | p.Arg2107His<br>p.Ser795Arg                                      |
| 50         | MM_0432* | M        | 22583                | 13        | 1                       | C           | c.4462T>C<br>c.5882G>A                                         | p.Cys1488Arg<br>p.Gly1961Glu                                     |
| 51         | MM_0433* | M        | 32177                | 6         | 3                       | A           | c.6729+5_19delGTTGGCCCTGGGGCA<br>c.6729+5_19delGTTGGCCCTGGGGCA | Splice site alteration<br>Splice site alteration                 |

Supplementary Table 1- Continue

**Children at Baseline with Childhood-onset Disease**

| Patient ID | Sex     | Pedigree | Age of Disease Onset | ERG Group | Genotype Classification | cDNA-Change | Variants                                                       | Protein Effect                                   |
|------------|---------|----------|----------------------|-----------|-------------------------|-------------|----------------------------------------------------------------|--------------------------------------------------|
| 52         | MM_0442 | F        | 22326                | 8         | 3                       | A           | c.5904delT<br>c.5904delT                                       | p.Phe1968LeufsTer6<br>p.Phe1968LeufsTer6         |
| 53         | MM_0444 | F        | 25860                | 8         | 3                       | C           | c.1622T>C<br>c.3113C>T<br>c.4469G>A                            | p.Leu541Pro<br>p.Ala1038Val<br>p.Cys1490Tyr      |
| 54         | MM_0454 | M        | 23153                | 10        | 1                       | C           | c.4670A>G<br>c.4670A>G<br>c.4577C>T                            | p.Tyr1557Cys<br>p.Val2050Leu<br>p.Thr1526Met     |
| 55         | MM_0471 | M        | 23550                | 4         | 2                       | A           | c.6729+5_19delGTTGGCCCTGGGGCA<br>c.6729+5_19delGTTGGCCCTGGGGCA | Splice site alteration<br>Splice site alteration |
| 56         | MM_0472 | F        | 26092                | 8         | 3                       | A           | c.5917delG<br>c.5917delG                                       | p.Val1973Ter<br>p.Val1973Ter                     |

**Adults at Baseline with Childhood-onset Disease**

| Patient ID | Sex     | Pedigree | Age of Disease Onset | ERG Group | Genotype Classification | cDNA-Change | Variants                                   | Protein Effect                                     |
|------------|---------|----------|----------------------|-----------|-------------------------|-------------|--------------------------------------------|----------------------------------------------------|
| 1          | MM_0065 | F        | 20842                | 16        | 3                       | B           | c.5196+1G>T<br>c.6079C>T                   | Splice site alteration<br>p.Leu2027Phe             |
| 2          | MM_0161 | M        | 20978                | 14        | NA                      | C           | c.3322C>T<br>c.5882G>A                     | p.Arg1108Cys<br>p.Gly1961Glu                       |
| 3          | MM_0242 | F        | 14447                | 14        | 1                       | B           | c.6209C>G<br>c.5714+5G>A                   | p.Thr2070Arg<br>Splice site alteration             |
| 4          | MM_0243 | F        | 14447                | 14        | 1                       | B           | c.6209C>G<br>c.5714+5G>A                   | p.Thr2070Arg<br>Splice site alteration             |
| 5          | MM_0247 | M        | 22853                | 14        | 1                       | C           | c.2588G>C<br>c.4918C>T                     | p.Gly863Ala<br>p.Arg1640Trp                        |
| 6          | MM_0317 | F        | 21553                | 5         | 3                       | C           | c.161G>A<br>c.3259G>A                      | p.Cys54Tyr<br>p.Glu1087Lys                         |
| 7          | MM_0332 | M        | 21868                | 10        | 3                       | B           | c.5461-10T>C<br>c.4577C>T                  | Splice site alteration<br>p.Thr1526Met             |
| 8          | MM_0336 | F        | 21479                | 14        | 1                       | B           | c.5461-10T>C<br>c.6319C>T                  | Splice site alteration<br>p.Arg2107Cys             |
| 9          | MM_0353 | M        | 23820                | 8         | 1                       | C           | c.5882G>A<br>c.53G>A                       | p.Gly1961Glu<br>p.Arg18Gln                         |
| 10         | MM_0383 | F        | 23050                | 13        | 1                       | C           | c.6079C>T<br>c.6079C>T                     | p.Leu2027Phe<br>p.Leu2027Phe                       |
| 11         | MM_0388 | F        | 20153                | 16        | 1                       | B           | c.2588G>C<br>c.2041C>T                     | p.Gly863Ala<br>p.Arg681Ter                         |
| 12         | MM_0393 | F        | 20331                | 16        | 1                       | D           | <b><u>c.3329-17T&gt;G</u></b><br>c.5882G>A | <b><u>Deep intronic change</u></b><br>p.Gly1961Glu |
| 13         | MM_0403 | F        | 21830                | 13        | 1                       | B           | c.1906C>T<br>c.6079C>T                     | p.Gln636Ter<br>p.Leu2027Phe                        |
| 14         | MM_0417 | M        | 25504                | 8         | 2                       | B           | c.2588G>C<br>c.4234C>T                     | p.Gly863Ala<br>p.Gln1412Ter                        |
| 15         | MM_0448 | F        | 21519                | 13        | 1                       | B           | c.3322C>T<br>c.1760+2T>C                   | p.Arg1108Cys<br>Splice site alteration             |

Supplementary Table 1- Continue

## Adults at Baseline with Adulthood-onset Disease

| Patient ID | Sex     | Pedigree | Age of Disease Onset | ERG Group | Genotype Classification | cDNA-Change | Variants                                                                  | Protein Effect                                                            |
|------------|---------|----------|----------------------|-----------|-------------------------|-------------|---------------------------------------------------------------------------|---------------------------------------------------------------------------|
| 1          | MM_0019 | M        | 20341                | 32        | 1                       | C           | c.6317G>A<br>c.6317G>A                                                    | p.Arg2106His<br>p.Arg2106His                                              |
| 2          | MM_0025 | F        | 20573                | 30        | 3                       | C           | c.4739T>C<br>c.2617T>C                                                    | p.Leu1580Ser<br>p.Phe873Leu                                               |
| 3          | MM_0047 | M        | 20764                | 17        | 1                       | B           | c.6729+5_19del15<br>c.4739T>C                                             | p.Phe2161Cysfs*3<br>p.Leu1580Ser                                          |
| 4          | MM_0057 | F        | 20801                | 36        | 1                       | C           | <b>c.2522A&gt;C</b><br>c.5882G>A                                          | <b>p.Gln841Pro</b><br>p.Gly1961Glu                                        |
| 5          | MM_0092 | F        | 17621                | 29        | 1                       | A           | c.859-9T>C<br>c.859-9T>C                                                  | Splice site alteration<br>Splice site alteration                          |
| 6          | MM_0101 | M        | 20917                | 27        | 1                       | D           | c.5882G>A                                                                 | p.Gly1961Glu                                                              |
| 7          | MM_0104 | M        | 19967                | 33        | 1                       | B           | c.4637T>G<br>c.5882G>A                                                    | p.Leu1546Ter<br>p.Gly1961Glu                                              |
| 8          | MM_0139 | F        | 19444                | 20        | 1                       | B           | c.571-1G>T<br>c.5087G>A                                                   | Splice site alteration<br>p.Ser1696Asn                                    |
| 9          | MM_0160 | M        | 21153                | 42        | 2                       | B           | <b><u>c.5196+1216C&gt;A</u></b><br>c.2588G>C<br><b><u>c.-14G&gt;A</u></b> | <b><u>Deep intronic change</u></b><br>p.Gly863Ala<br><b><u>5'-UTR</u></b> |
| 10         | MM_0318 | M        | 16487                | 18        | 1                       | C           | c.6089G>A<br>c.4222T>C<br>c.4918C>T                                       | p.Arg2030Gln<br>p.Trp1408Arg<br>p.Arg1640Trp                              |
| 11         | MM_0333 | F        | 33458                | 28        | 1                       | C           | c.2894A>G<br>c.5882G>A                                                    | p.Asn965Ser<br>p.Gly1961Glu                                               |
| 12         | MM_0365 | M        | 16854                | 39        | 1                       | C           | c.4577C>T<br>c.71G>A                                                      | p.Thr1526Met<br>p.Arg24His                                                |
| 13         | MM_0376 | F        | 25338                | 25        | 1                       | B           | <b><i>c.5931_5941dup11</i></b><br>c.5882G>A                               | <b><i>p.Phe1982LysfsTer14</i></b><br>p.Gly1961Glu                         |
| 14         | MM_0390 | F        | 25352                | 40        | 1                       | C           | c.5882G>A<br>c.2297G>A                                                    | p.Gly1961Glu<br>p.Gly766Asp                                               |
| 15         | MM_0409 | F        | 22973                | 35        | 1                       | C           | c.6079C>T<br>c.1253T>C                                                    | p.Leu2027Phe<br>p.Phe418Ser                                               |
| 16         | MM_0425 | F        | 31700                | 26        | Normal                  | C           | c.5882G>A<br>c.4793C>A                                                    | p.Gly1961Glu<br>p.Ala1598Asp                                              |
| 17         | MM_0428 | M        | 35573                | 18        | 1                       | C           | c.1253T>C<br>c.2588G>C                                                    | p.Phe418Ser<br>p.Gly863Ala                                                |
| 18         | MM_0429 | M        | 16804                | 17        | 1                       | B           | c.5882G>A<br>c.5461-10T>C                                                 | p.Gly1961Glu<br>Splice site alteration                                    |
| 19         | MM_0465 | F        | 22054                | 26        | 1                       | C           | c.5882G>A<br>c.5882G>A                                                    | p.Gly1961Glu<br>p.Gly1961Glu                                              |

Pathogenicity of novel variants was assessed with the previously reported methods. (Fujinami et al. Invest Ophthalmol Vis Sci. 2013;54:6662–6674)

Novel possible disease-causing variants are in bold and italics

Novel variants with uncertain effects are in bold and underlined

\*Patients previously reported; Tanna P, Georgiou M, Strauss RW, et al. Cross-Sectional and Longitudinal Assessment of the Ellipsoid Zone in Childhood-Onset Stargardt Disease. Transl Vis Sci Technol 2019;8(2):1. <sup>36</sup>
